# Supplementary material for: γ-aminobutyric acid receptor B signaling drives glioblastoma in females in an immune-dependent manner
Source: PubMed Central journal article supplement — bioRxiv. 2024 Jul 22:2024.07.18.603996. Preprint. [Version 1] doi: 10.1101/2024.07.18.603996 (PMC11291093; doi:10.1101/2024.07.18.603996), 2024-07-22
Supplement: NIHPP2024.07.18.603996v1-supplement-1.pdf [file NIHPP2024.07.18.603996v1-supplement-1.pdf]

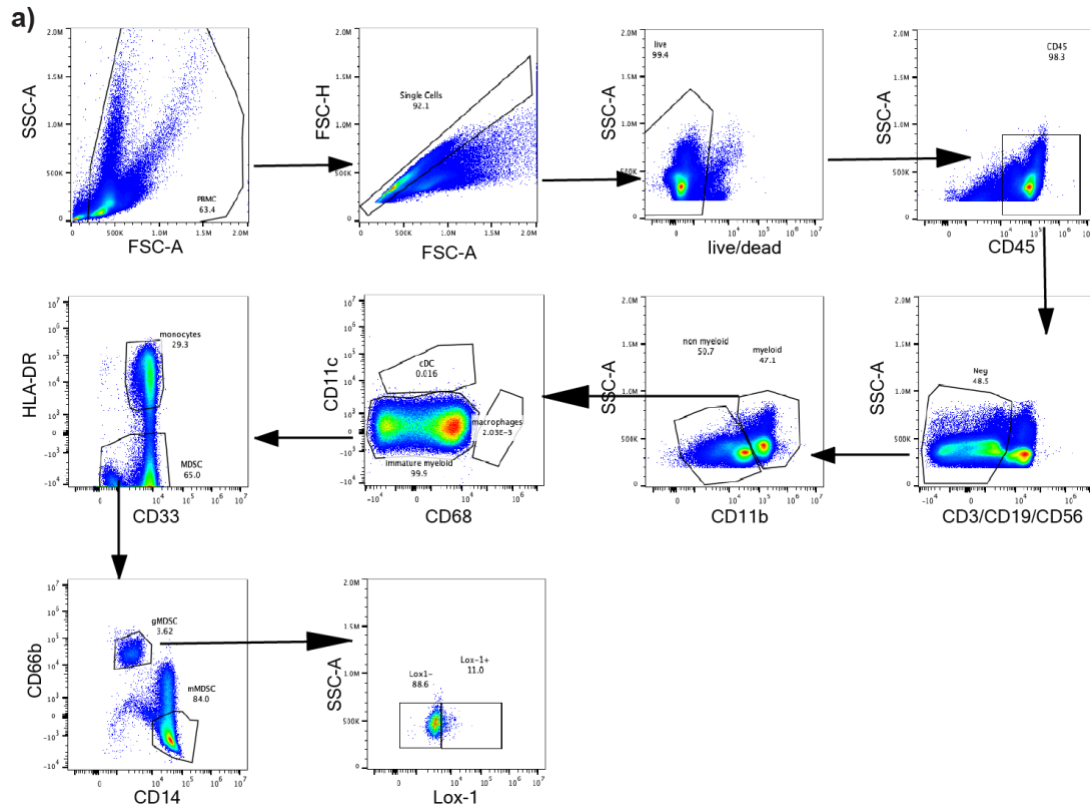

**Supplementary Figure 1: Identification of immune populations from human PBMCs.** Gating strategy of immune populations from healthy human PBMCs.

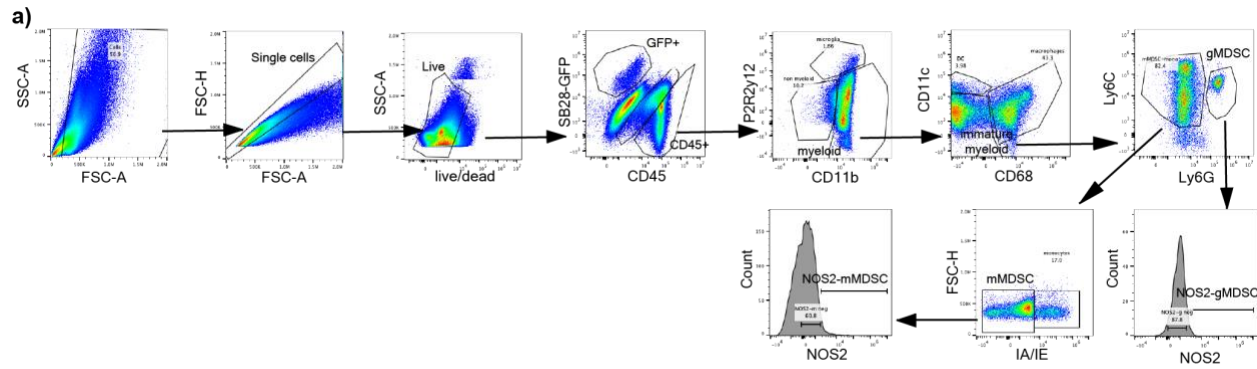

**Supplementary Figure 2: Gating strategy for immune populations from SB28-bearing mice.** Gating strategy of immune populations and NOS2 expression from vehicle or CGP 35348 treated mice.
